1 **Combinatorial engineering for photoautotrophic production of**  
2 **recombinant products from the green microalga *Chlamydomonas***  
3 ***reinhardtii***

4 Malak N. Abdallah<sup>1</sup>, Gordon B. Wellman<sup>1</sup>, Sebastian Overmans<sup>1</sup>, Kyle J. Lauersen<sup>\*1</sup>

5

6 <sup>1</sup>Bioengineering Program, Biological and Environmental Sciences and Engineering Division,  
7 King Abdullah University of Science and Technology (KAUST), Thuwal 23955-6900,  
8 Kingdom of Saudi Arabia

9

10 \* Corresponding author: [kyle.lauersen@kaust.edu.sa](mailto:kyle.lauersen@kaust.edu.sa)

11

12

13

14 **Keywords:** Microalgae, Phosphite, Algal Biotechnology, Waste Reuse, Metabolic  
15 Engineering, Isoprenoids, Terpenoids

16 **Abstract**

17 *Chlamydomonas reinhardtii* has emerged as a powerful green cell factory for  
18 metabolic engineering of sustainable products created from the photosynthetic  
19 lifestyle of this microalga. Advances in nuclear genome and transgene expression  
20 engineering are allowing robust engineering strategies to be demonstrated in this  
21 host. However, commonly used lab strains are not equipped with features to enable  
22 their broader implementation in non-sterile conditions and high-cell density concepts.  
23 Here, we use combinatorial chloroplast and nuclear genome engineering to  
24 complement the *C. reinhardtii* strain UVM4 with publicly available genetic tools to  
25 enable the use of inorganic phosphite and nitrate as a sole the source phosphorous  
26 and nitrogen, respectively. We present recipes to create phosphite-buffered media  
27 solutions that enable high cell density algal cultivation. We then combine previously  
28 reported engineering strategies to produce the heterologous sesquiterpenoid  
29 patchoulol to high titers from our engineered green cell factories and show these  
30 products are possible to produce in under non-sterile conditions. Our work presents  
31 a straightforward means to generate *C. reinhardtii* strains for broader application in  
32 bio-processes for the sustainable generation of products.

## 33 1. Introduction

34 The model green microalga *Chlamydomonas reinhardtii* has emerged in recent years  
35 as a newcomer in the metabolic engineering space due to enabling advances in  
36 transgene design (Baier et al., 2018b, 2020) and the use of nuclear mutants with  
37 enhanced transgene expression rates (Neupert et al., 2009). *C. reinhardtii* has been  
38 extensively used as a host for chloroplast genome engineering for the expression of  
39 recombinant proteins for several years (Wannathong et al., 2016; Dyo and Purton,  
40 2018). However, this alga has historically demonstrated recalcitrance to nuclear  
41 transgene expression owing to genetic architectures with high guanine-cytosine (GC)  
42 nucleotide content and intron density, as well as a recently characterized epigenetic  
43 silencing mechanism (Neupert et al., 2020). Through a series of mutational events,  
44 strains UVM4 and UVM11 were generated which exhibited improvements in  
45 transgene expression over others (Neupert et al., 2009; Barahimipour et al., 2016).  
46 UVM4 has become a workhorse strain for demonstrations of efficient transgene  
47 expression, with examples of heterologous production of sesquiterpenes (Lauersen  
48 et al., 2016; Wichmann et al., 2018), diterpenes (Lauersen et al., 2018; Einhaus et  
49 al., 2021), and polyamines (Freudenberg et al., 2021), modified fatty acid and alkene  
50 contents (Yunus et al., 2018), secreted recombinant proteins (Lauersen et al.,  
51 2013b, 2013a, 2015a; Baier et al., 2018a), and altered pigment composition  
52 (Perozeni et al., 2020). The reduced epigenetic silencing of this strain coupled with  
53 improvements of synthetic intron-addition transgene design strategies (Baier et al.,  
54 2018b, 2020) and optimized regulatory element combinations (Scranton et al., 2016;  
55 Einhaus et al., 2021), have resulted in an increased momentum for algal synthetic  
56 biology and green biotechnology applications with these hosts (Lauersen, 2019). *C.*  
57 *reinhardtii* represents a model green microalga that has very well developed  
58 molecular toolkits, including optimized (Lauersen et al., 2015b; Wichmann et al.,  
59 2018) and modular cloning (MoClo) plasmids (Crozet et al., 2018). Although a great  
60 deal of advancement has been made in gene expression and genetic engineering  
61 design, major limitations to scalable cultivation of *C. reinhardtii* remain which limits  
62 the broader development of engineered algal bio-processes.

63 Cultivation of *C. reinhardtii* is conducted at neutral pH, which means that the protein-  
64 rich algal cells are subject to rapid contamination/predation in non-sterile conditions.  
65 Sterility is difficult to maintain in large-scale cultivation concepts or in complicated  
66 bio-processes. Other industrially cultivated algae have features such as extreme pH  
67 or salinity tolerance which allow cultivation in selective conditions, or are dominant  
68 fast-growing, aggressive species. Although fast-growing, the UVM4 strain is also  
69 nitrate incapable. The use of nitrate is common in larger-scale algal cultivation  
70 media, as this nitrogen source does not cause significant pH shifts during its  
71 consumption. Complementation of nitrate metabolism is also important for increasing  
72 cell densities in cultivations, as has been recently demonstrated for the production of  
73 polyamines from this host (Freudenberg et al., 2021). The risk of contamination in  
74 addition to lack of nitrate metabolism capabilities make UVM4 deficient in features  
75 which would enable its broader use as an engineered algal green-cell factory outside  
76 of proof-of-principle laboratory experiments. One strategy for reducing contamination  
77 of algal cultures is the introduction of metabolic capacity for metabolism of inorganic  
78 phosphite as a phosphorous source. This has been shown in numerous organisms,  
79 including *C. reinhardtii*, to reduce contamination and act as a selection agent (López-  
80 Arredondo and Herrera-Estrella, 2012; Loera-Quezada et al., 2016; Changko et al.,  
81 2020; Cutolo et al., 2020; Dahlin and Guarnieri, 2022). Engineered expression of  
82 *Pseudomonas stutzeri* WM88 phosphite NAD<sup>+</sup> oxidoreductase *ptxD* from either the

83 chloroplast or nuclear genomes of algae has been shown to confer the ability to  
84 metabolize phosphite (López-Arredondo and Herrera-Estrella, 2012; Changko et al.,  
85 2020; Cutolo et al., 2020; Dahlin and Guarnieri, 2022).

86 To date, demonstrated advances in nuclear transgene expression for metabolic  
87 engineering described above have not incorporated combinatorial engineering with  
88 chloroplast expression constructs in the same strain. Here, we combined published  
89 advances in chloroplast engineering (Changko et al., 2020) with multiple nuclear  
90 engineering steps in UVM4 to demonstrate growth of this strain in phosphite- and  
91 nitrate-containing media while producing a proof-of-concept heterologous  
92 sesquiterpenoid. We present recipes to enable high-cell density cultivation in  
93 phosphite-buffered media and show that heterologous metabolites can be generated  
94 in the presence of microbial contamination. Our work shows that advances in nuclear  
95 and chloroplast engineering can be combined to yield more powerful green cell  
96 chassis that are amenable to bio-process goals.

97

98

## 99 2. Materials and Methods

### 100 2.1. Algal cultivation and growth measurements

101 *Chlamydomonas reinhardtii* strain UVM4 was used as the parental strain for  
102 transformations. This strain was derived from several rounds of mutation in the  
103 parental CC-4350 by Dr. Juliane Neupert in the lab of Prof. Dr. Ralph Bock (Neupert  
104 et al., 2009) and contains a mutation in Sir2-type histone deacetylase (SRTA) which  
105 enables improved transgene expression rates from the algal nuclear genome  
106 (Neupert et al., 2020). UVM4 is not able to use nitrate as a nitrogen source due to  
107 *nit1/nit2* locus mutations (Freudenberg et al., 2021). Microalgal cultures were  
108 routinely maintained in Tris acetate phosphate (TAP) medium (Gorman and Levine,  
109 1965) with updated trace element solution (Kropat et al., 2011) and maintained  
110 under  $150 \mu\text{mol m}^{-2} \text{s}^{-1}$  mixed cold and warm LED lights with 120-190 rpm agitation  
111 in shake flasks or microtiter plates. Light intensities and spectra were measured with  
112 a handheld spectrometer (Spectromaster C-7000, Sekonic). Ammonium in TAP salts  
113 solution was replaced with equimolar  $\text{NaNO}_3$  to make TAP- $\text{NO}_3$ . Replacements of  
114 phosphate with phosphite to make TAPhi and TAPhi- $\text{NO}_3$  media are described in  
115 Supplemental File 1.

116 High-density 6xP medium was prepared as described in (Freudenberg et al., 2021)  
117 and buffered phosphite solutions to match molar concentrations of phosphorous to  
118 make 6xPhi medium are as described in Supplemental File 1. All phosphite solutions  
119 were filter sterilized and added to media after autoclaving. Cultivation in CellDeg  
120 HD100 cultivators (CellDeg GmbH, Germany) was performed with the indicated light  
121 and  $\text{CO}_2$  regimes by the growth control unit using either 6xP or 6xPhi media.  
122 Illumination was delivered by a Valoya broad spectrum LED board supplied by  
123 CellDeg GmbH (Germany, spectrum presented in Supplemental File 2).

124 Growth of algae and contaminants was analyzed by flow cytometry using an  
125 Invitrogen Attune NxT flow cytometer (Thermo Fisher Scientific, UK) equipped with a  
126 488 nm blue laser for forward scatter and side scatter measurements, and a 695/40  
127 nm filter to detect chlorophyll and non-fluorescent particles, respectively. All culture  
128 samples were diluted 1/100 with 0.9% NaCl solution and measured in technical  
129 triplicates using previously described settings (Overmans and Lauersen, 2022).

### 131 2.2. Plasmids, algal transformation, and screening for phosphite and nitrate 132 metabolism

133 Plasmids used in this study are listed in Supplemental Table 1. All cloning and  
134 plasmid linearization was performed with Thermofisher FastDigest restriction  
135 enzymes, New England Biolabs Quick Ligase, and Q5 polymerase following  
136 manufacturer's protocols. Plasmids were maintained in chemically competent  
137 *Escherichia coli* DH5a transformed by heat shock. Glass bead transformation of *C.*  
138 *reinhardtii* was performed as previously described for both chloroplast and nuclear  
139 targeted genetic constructs (Kindle, 1990; Kindle et al., 1991). Chloroplast  
140 transformation of the p $\text{PO}_3$  plasmid ((Changko et al., 2020) graciously provided by  
141 Prof. Saul Purton) was performed with 10  $\mu\text{g}$  circular DNA and 0.1 mm diameter  
142 glass beads rather than 0.424-0.600 mm as commonly used for nuclear  
143 transformation. Recovery was performed in 45 mL TAPhi liquid for 5 d with 150  $\mu\text{E}$   
144 PAR prior to plating. Selection was achieved by plating on TAPhi agar plates  
145 incubated at 200  $\mu\text{E}$  for 2-3 weeks. Colonies were then grown in TAPhi liquid in  
146 microtiter plates until green.

147 One transformant with clear growth in liquid TAPhi, hereafter named UVM4-phi, was  
148 transformed for complementation of nitrate metabolic capacity by co-transformation  
149 of linearized pMN24 (Fernández et al., 1989b) and pMN68 (Schnell and Lefebvre,  
150 1993) (Chlamydomonas Resource Center, <https://www.chlamycollection.org>) by  
151 glass beads as previously described (Freudenberg et al., 2021) with overnight  
152 recovery and subsequent selection on TAPhi-NO<sub>3</sub> agar plates. Transformant  
153 colonies recovered on TAPhi-NO<sub>3</sub> plates were then compared in liquid media in 24-  
154 well microtiter plates with standard lighting conditions at 180 rpm. Homoplasmy of  
155 the pPO3 integration into the chloroplast genome was determined by PCR using  
156 primers Fw: AATTGTATGGGCTCACAACTTAAAGT and Rv:  
157 TAAAATTGTGAGACCATGAGTAATGTTCTCC. The resulting transformants were  
158 also screened by iodine vapour assay as previously described (Wichmann et al.,  
159 2018) to determine if random integration had caused starch synthesis modifications.  
160 Modified UVM4 transformants which grew with phosphite and nitrate are referred to  
161 as UVM4-Phosphite-Nitrate (UPN) strains.  
162 Efficiency of nuclear transgene expression of intermediate strains was investigated  
163 by glass bead transformation of the pOpt2\_mVenus\_Paro plasmid (Wichmann et al.,  
164 2018) followed by selection on each respective modified medium with 10 mg L<sup>-1</sup>  
165 paromomycin and fluorescent reporter expression analysis. Fluorescent mVenus  
166 expression intensities were analyzed by picking primary transformant colonies using  
167 a PIXL robot (Singer Instruments, UK) to 384 colonies/plate layout on manufacturer  
168 supplied rectangular Petri dishes. After one week, colonies were replicated using the  
169 Singer Instruments ROTOR to generate imaging-ready colonies. White-light pictures  
170 of algae colony plates were taken in the built-in PIXL camera. Chlorophyll and  
171 mVenus fluorescence signals were captured in an Analytik Jena Chemstudio Plus  
172 gel doc with eLite halogen light source and excitation filters. Chlorophyll fluorescence  
173 was captured by 475/20 nm excitation with orange DNA gel emission filter with 1 sec  
174 exposure, while mVenus signal was captured with 510/10 nm excitation and 530/10  
175 nm emission filter with 30 sec exposure.  
176

### 177 **2.3. Generation of patchoulol producing UPN transformants**

178 Plasmids for algal nuclear genome-based expression of the *Pogostemon cablin*  
179 patchoulol synthase (*PcPS*, UniProt Q49SP3) were adapted from (Lauersen et al.,  
180 2016). The gene expression cassette for *PcPS* expression was modified from the  
181 pOpt2 vector concept of (Wichmann et al., 2018) to contain transgene designs  
182 presented in (Einhaus et al., 2021; Freudenberg et al., 2021). Briefly, *PcPS*  
183 expression here was driven by the hybrid heat shock 70A-beta-bubulin promoter  
184 described by (Einhaus et al., 2021) and the mVenus cassette was modified to  
185 contain 2 copies of the *C. reinhardtii* ribulose-1,5-bisphosphate  
186 carboxylase/oxygenase small subunit (RBCS2) intron 1. The RBCS2 intron 2 was  
187 moved into the C-terminal strep-II tag of the gene-of-interest expression cassette in  
188 the pOpt2\_mVenus\_Paro plasmid which confers paromomycin resistance in *C.*  
189 *reinhardtii* (Wichmann et al., 2018). *PcPS* was subcloned into *Bam*HI-*Bg*II, and 2X,  
190 3X, and 4X *PcPS* expression cassettes were built by *Scal*-*Bg*II inserts from the  
191 previous plasmid subcloned into *Scal*-*Bam*HI of the progenitor plasmid described in  
192 Supplemental Figure 1. All constructs contain the C-terminal mVenus (YFP) fusion  
193 which enabled plate-level fluorescence detection in UPN colonies picked by the PIXL  
194 robot. *C. reinhardtii* squalene synthase (UniProt A8IE29) knockdown was achieved  
195 by secondary transformation using the previously described pOpt2\_cCA-gLuc\_i3-  
196 SQS\_Spect plasmid (Wichmann et al., 2018). UPN *PcPS*-YFP + SQS k.d. double

197 transformants were selected on TAPhi-NO<sub>3</sub> agar media containing 10 mg L<sup>-1</sup>  
198 paromomycin and 200 mg L<sup>-1</sup> spectinomycin as previously described (Wichmann et  
199 al., 2018). YFP and luciferase signals of UPN colonies were captured in the  
200 Chemstudio PLUS with previously described buffers and reagents for *Gaussia*  
201 *princeps* luciferase bioluminescence analysis (Lauersen et al., 2013a). Full-length  
202 target recombinant protein was determined by SDS PAGE and in-gel fluorescence of  
203 whole cell pellets in the Chemstudio PLUS. All plasmid sequence files used in this  
204 work are given in Supplemental File 3.  
205

### 206 **2.3.1 Gas Chromatography analysis of patchouli productivity**

207 UPN transformants expressing PcPS variants were screened for heterologous  
208 patchouli productivity by cultivation in 4.5 mL TAPhi-NO<sub>3</sub> media with 500 µl  
209 dodecane overlay in triplicates for 6 d as previously described (Lauersen et al.,  
210 2018). Six individual transformants were investigated for each plasmid construct or  
211 combination after fluorescence, or fluorescence and luciferase, screening at the  
212 agar-plate level. Dodecane samples were collected from cultures, 90 µl of each  
213 collected dodecane sample was transferred into triplicate GC vials. A patchouli  
214 standard (18450, Cayman Chemical Company, USA) calibration curve in the range  
215 10–200 µM patchouli in dodecane was used for linear-range quantification. 250 µM  
216 of alpha-humulene (CRM40921, Sigma-Aldrich, USA) was added as an internal  
217 standard to each dodecane sample and patchouli standard. Quantification methods  
218 and calculations are shown in Supplemental File 4. The dodecane samples were  
219 analyzed using an Agilent 7890A gas chromatograph (GC) equipped with a DB-5MS  
220 column (Agilent J&W, USA) attached to a 5975C mass spectrometer (MS) with triple-  
221 axis detector (Agilent Technologies, USA). A previously described GC oven  
222 temperature protocol was used (Overmans and Lauersen, 2022). All GC-MS  
223 measurements were performed in triplicate (n=3), and chromatograms were  
224 manually reviewed for quality control. Gas chromatograms were evaluated with  
225 MassHunter Workstation software version B.08.00 (Agilent Technologies, USA).  
226

### 227 **2.4. Test of intentional contamination in cultures**

228 To test the ability of engineered *C. reinhardtii* UPN lines to withstand contamination  
229 in non-sterile conditions using media modifications presented in this work, cultivation  
230 was performed with intentional yeast contamination. TAP-NO<sub>3</sub>, TAPhi-NO<sub>3</sub>, 6xP, and  
231 6xPhi media were used to cultivate an engineered SQS k.d. + 2XPcPs expressing  
232 UPN transformant. *Saccharomyces cerevisiae* (yeast) cells were cultured in Yeast  
233 Extract-Peptone-Dextrose (YPD) medium (Cold Spring Harbor Protocols) overnight  
234 at 28°C. The following day, pelleted cells were resuspended in 300 mL 6xP or 6xPhi  
235 media. Triplicate wells in 6-well microtiter plates containing 4 mL dilute UPN  
236 patchouli culture in 6xP or 6xPhi media were inoculated with either 500 µl of yeast-  
237 solutions (above) or clean medium as controls. 500 µl of n-dodecane overlay was  
238 also added to each well. Approximately 3mL of concentrated potassium bicarbonate  
239 buffer was added between the wells to provide a dilute CO<sub>2</sub> atmosphere as  
240 previously described (Dienst et al., 2020). Cultures in TAP-media were grown for 6 d  
241 and 6xP/Phi for 9 d on laboratory shakers at 120 rpm with 12h:12h light:dark cycle  
242 (150 µE). Cell densities and patchouli productivities were analyzed as described  
243 above.  
244  
245  
246

## 247 **3. Results**

### 248 **3.1. Phosphite and nitrate metabolism can be combined in the nuclear mutant** 249 **UVM4**

250 The *C. reinhardtii* mutants UVM4 and UVM11 (Neupert et al., 2009) exhibit reduced  
251 transgene silencing due to a mutation in the Sir2-type histone deacetylase (SRTA)  
252 (Neupert et al., 2020). UVM4 has served as a powerful parent strain for many recent  
253 examples of metabolic engineering in this green microalga (Lauersen et al., 2016,  
254 2018; Wichmann et al., 2018; Einhaus et al., 2021; Freudenberg et al., 2021).  
255 Despite its value for past experiments, the alga is grown at neutral pH and contains  
256 mutations in its nitrate metabolism which prevent use of this nitrogen source. These  
257 two features manifest in high-risk of microbial contamination and the inability to use  
258 industrially relevant culture media (Changko et al., 2020; Freudenberg et al., 2021).  
259 To prepare UVM4 strains for broader applications, we set to complement it with the  
260 capacity to use phosphite as a P source and nitrate as an N source.

261 We complemented UVM4 with plasmid pPO3 (Changko et al., 2020), to express the  
262 *P. stutzeri* WM88 phosphite NAD<sup>+</sup> oxidoreductase *ptxD* (López-Arredondo and  
263 Herrera-Estrella, 2012) that converts inorganic phosphite into organic phosphate  
264 from the algal chloroplast genome (Figure 1A). We found it was possible to transform  
265 UVM4 with this chloroplast genome-integrating plasmid by glass bead transformation  
266 and select colonies on TAPhi medium with no additional selection pressure. A  
267 resulting UVM4-phi transformant was then subsequently transformed with pMN24  
268 and pMN68 plasmids which contain genomic copies of the *nit1* and *nit2* loci  
269 respectively to complement nitrate metabolism capacity (Fernández et al., 1989a;  
270 Schnell and Lefebvre, 1993) (Figure 1A).

271 Colonies were recovered by selection on TAPhi-NO<sub>3</sub> plates with no antibiotic (Figure  
272 1A). Complementation with *nit1/2* can sometimes lead to colonies that survive on  
273 agar plate, but do not perform well in liquid medium. Therefore, we also  
274 benchmarked performance of 24 UVM4-phosphite-nitrate (UPN) colonies derived  
275 from these transformations in TAPhi-NO<sub>3</sub> and photoautotrophic cultivation with CO<sub>2</sub>  
276 as a carbon source (Figure 1A, lower right). Parental strains were not able to grow in  
277 the selective media for each plasmid. UPN strains grown in liquid medium exhibited  
278 variable performance, especially in photoautotrophic conditions (Figure 1A,B). Most  
279 colonies maintained normal starch accumulation, which was qualitatively assessed  
280 by iodine vapour, however, colonies 19 and 23 showed reduced iodine staining  
281 (Figure 1C). Homoplasmy of pPO3 integration was determined in UVM4-phi and  
282 nitrate complemented strains (Supplemental Figure 2).

283 To confirm that the three plasmid integrations did not modify the performance of the  
284 parent UVM4 capacities for nuclear transgene expression, several UPN strains with  
285 acceptable growth in liquid phosphite-nitrate media were transformed with a YFP  
286 reporter plasmid (Wichmann et al., 2018). High-throughput robotics assisted colony  
287 picking allowed analysis of between 943-1079 colonies for each strain and plate-  
288 level reporter imaging was used to quantify reporter expression across the  
289 populations. YFP reporter expression efficiencies in the final UPN strains were  
290 comparable to parent UVM4 (Figure 1D).

### 291 292 **3.2. Phosphite can replace phosphate in buffered media for high cell-density** 293 **cultivation of algal cells**

294 Using mono- and di-basic forms of phosphite, we generated a buffered phosphite  
295 solution to emulate the phosphate buffer solution of recently published 6xP medium



296 (Freudenberg et al., 2021) (Supplemental File 1). In order to compare whether our  
297 high-density phosphite medium (6xPhi) could be used in a comparable fashion to  
298 6xP, we benchmarked growth of a UPN strain in a high-density cultivation concept  
299 using high-light and membrane delivered CO<sub>2</sub> in CellDeg HD100 cultivators (Figure  
300 2A). We did not observe differences in performance for the UPN strain cultivated in  
301 6xP or 6xPhi which reached comparable cell densities throughout cultivation (Figure  
302 2B).

303

### 304 **3.3. Heterologous products can be efficiently made in UPN strains**

305 We then chose to combine two proven engineering strategies for sesquiterpenoid  
306 production from a UPN strain grown only in TAPhi-NO<sub>3</sub> medium. The *C. reinhardtii*  
307 codon optimized *P. cablin* patchouliol synthase (*PcPS*) was expressed in 1, 2, 3, and  
308 4X copy fusion protein constructs with C-terminal YFP from the nuclear genome of  
309 this alga (Figure 3). Robotics assisted colony picking and YFP screening allowed  
310 selection of six transformants per plasmid with confirmed *PcPS* expression which  
311 were benchmarked for patchouliol productivity as previously described (Lauersen et  
312 al., 2018). The best performing transformants were subsequently transformed with a  
313 secreted luciferase-artificial-micro-RNA expression construct targeting the *C.*  
314 *reinhardtii* squalene synthase (SQS)(Wichmann et al., 2018). After colony recovery  
315 and robotics picking, plate-level imaging was used to isolate colonies with YFP  
316 fluorescence signal (*PcPS*) and luciferase activity (SQS k.d.) (Figure 3). Patchouliol  
317 productivity analysis indicated striking improvements in patchouliol productivity for  
318 SQS k.d. strains compared to parentals with the best performing strains generating  
319 ~145 fg patchouliol cell<sup>-1</sup> (Figure 3). Full-length fusion protein expression could be  
320 confirmed only for 1-3X *PcPS*-YFP constructs by in gel fluorescence (Supplemental  
321 Figure 3).

322

### 323 **3.4. Nitrate and phosphite can both assist contaminant control in algal** 324 **cultures**

325 As contamination of cultures can be an issue with neutral pH cultivation, we wanted  
326 to determine if phosphite and nitrate could permit algal growth in the presence of  
327 contamination. We intentionally contaminated the best performing UPN *PcPS* SQS  
328 k.d. strain in mixotrophic (acetic acid) and photoautotrophic cultures in media with  
329 nitrate as a nitrogen source and either phosphate or phosphite as a phosphorous  
330 source. Yeast cells were added to cultures directly in higher cellular abundances  
331 than algal cells (Figure 4). In all media conditions, yeast cells did not proliferate,  
332 regardless of the presence of organic carbon, but also did not reduce in number.  
333 When acetic acid (TAP-derived) media were used, algal growth was reduced  
334 compared to cultivations without yeast, also with phosphite (Figure 4). No difference  
335 in performance was noted in photoautotrophic cultures. In all conditions, the  
336 presence of high concentrations of yeasts in cultivations did not inhibit heterologous  
337 patchouliol production (Figure 4).

338 We then benchmarked patchouliol productivity in a 200 mL culture in a membrane  
339 gas delivery bioreactor containing 10% dodecane overlay to capture heterologous  
340 sesquiterpenoid product. Culture volume was adjusted to 200 mL to avoid contact of  
341 dodecane with the hydrophobic gas delivery membrane during shaking and the  
342 culture was operated in non-sterile conditions. The culture accumulated up to  
343  $6.5 \times 10^7 \pm 1.9 \times 10^6$  cells mL<sup>-1</sup> and generated 6.2 mg L<sup>-1</sup> patchouliol in 6 days using this  
344 system.

345

## 346 **4. Discussion**

### 347 **4.1. Designing engineerable strains to be ready for bio-processes**

348 We chose phosphite metabolism complementation with plasmid pPO3 as this also  
349 contains extra future chloroplast genome engineering potential through the addition  
350 of the  $W_{TGA}$  tRNA for tryptophan as previously described (Changko et al., 2020).  
351 When filter sterilization was used, transformation and selection on phosphite  
352 solutions was greatly improved and appearance of background algal growth at the  
353 plate level was reduced (data not shown). After confirmed growth of pPO3  
354 transformants in liquid phosphite, nitrate metabolism was complemented by  
355 transformation of both pMN24 (*NIT1*) and pMN68 (*NIT2*) plasmids in UVM4. This  
356 double transformation is relatively inefficient, nevertheless, we could generate  
357 several dozen colonies per transformation which recovered on nitrate plates.  
358 Colonies which recovered on nitrate plates did, however, not all perform well in liquid  
359 culture growth in nitrate-containing liquid media. We chose to move forward with only  
360 those colonies which appeared to grow to dark green stationary phase (Figure 1A).  
361 Colonies were then checked for homoplasmy integration of the pPO3 phosphite  
362 conferring plasmid (Supplemental Figure 2) and two were benchmarked for their  
363 growth in phosphite- and nitrate-containing media compared to their parental strains  
364 (Figure 1B).

365 To determine if our strategy for UVM4 augmentation would allow future engineering  
366 to benefit from these metabolic enhancements, two questions remained: 1.) was  
367 nuclear transformation expression efficiency disturbed during these events in UVM4  
368 derivatives? 2.) Can inorganic phosphite be used in a similar way to organic  
369 phosphate, for buffered media solutions? We benchmarked two fully complemented  
370 UPN transformants, their UVM4-phi parent, and the UVM4 starting strain for YFP  
371 efficiency expression from the nuclear genome. Using high-throughput colony  
372 picking, we were able to analyze ~1000 colonies per transformation event and  
373 compare YFP expression efficiencies across the populations (Figure 1C). Although  
374 some variance, there was little difference could be seen in the total ratio of high and  
375 mid-range YFP expressing colonies, suggesting our three plasmid integrations had  
376 not modified this capacity.

377 We then set out to make a buffered phosphite solution which could replace buffered  
378 phosphate solutions in culture media (Supplemental File 1). In direct comparisons of  
379 growth tests, the UPN strain did not show performance differences in phosphite  
380 compared to phosphate in photoautotrophic high-density cultivations (Figure 2). Our  
381 results indicate this is an effective strategy to use inorganic phosphite as a media  
382 component. As phosphate is a globally dwindling resource important to agriculture,  
383 bio-conversion of phosphite into phosphate may also enable the use of this waste  
384 mineral to yield bio-fertilizers through algal cultivation.

385

### 386 **4.2. Patchoulol production in metabolically complemented strains**

387 UPN strains were maintained exclusively on TAPhi-NO<sub>3</sub> medium for all routine lab  
388 work. A further aim was to determine if it was possible to conduct additional  
389 metabolic engineering in these strains for heterologous isoprenoid production using  
390 Phi-NO<sub>3</sub> media. Plasmids were constructed based on previous designs to express  
391 the patchoulol synthase (*PcPS*) and localize it in the cytoplasm of the alga where this  
392 enzyme is known to convert freely available farnesyl pyrophosphate (FPP) into  
393 patchouli alcohol (patchoulol)(Lauersen et al., 2016). We chose to combine recently  
394 published modifications in promoter(Einhaus et al., 2021) and intron

395 use(Freudenberg et al., 2021) (Supplemental Figure 1), in order to assist  
396 recombinant protein accumulation in an effort to enhance product yields. Previous  
397 work on *PcPS*, indicated cellular patchouliol productivities could be enhanced when  
398 the protein was fused to itself in a repetitive fashion to yield more active sites per  
399 translated protein(Lauersen et al., 2016). Here, we copied this gene design strategy  
400 and combined it with an artificial micro-RNA (amiRNA) knockdown of the squalene  
401 synthase (SQS) (Figure 3). It was previously found that SQS k.d. improved (*E*)- $\alpha$ -  
402 biabolene titers from the cytoplasm of *C. reinhardtii* as this is the direct competitor for  
403 FPP precursor(Wichmann et al., 2018). Additive *PcPS* units were found here to  
404 increase cellular patchouliol yields as previously observed (Lauersen et al., 2016).  
405 However, increasing repetitions past 3 *PcPS* copies was found to be unstable and  
406 did not generate reliable patchouliol expression strains (Figure 3, Supplemental  
407 Figure 3). As expected based on past work with bisabolene(Wichmann et al., 2018),  
408 addition of the SQS k.d. to the best performing *PcPS* variant of each plasmid lead to  
409 transformants with drastic improvements in patchouliol productivity. Previous  
410 engineering of patchouliol production for *C. reinhardtii* lead to a maximal volumetric  
411 productivity of  $\sim 350 \mu\text{g patchouliol L}^{-1}$  in mixotrophic 400 mL bioreactor conditions  
412 from a 3X*PcPS*-YFP transformant(Lauersen et al., 2016). Here, a 2X*PcPS*  
413 transformant subsequently transformed with the SQS k.d. generated lines producing  
414 700-1400  $\mu\text{g patchouliol L}^{-1}$  culture (Figure 3, Supplemental Figures 4 and 5).  
415 Apparent improvements in 1-4X *PcPS*-YFP lines were observed by SQS k.d. and  
416 from 1-3X*PcPS*-YFP, mean production increased with increasing *PcPS* units from  
417 1X-3X*PcPS*. Maximal cellular productivity was observed in a single 2X*PcPS* SQS  
418 k.d. line, with up to 143 fg patchouliol cell<sup>-1</sup> (Figure 3).

419 A risk to scaled cultivation of engineered *C. reinhardtii* in bio-production concepts is  
420 contamination and reduced productivities, which is especially true for cell-wall  
421 deficient strains that may be more readily outcompeted by contaminants. We  
422 intentionally contaminated mixotrophic and photoautotrophic media containing either  
423 NO<sub>3</sub> or Phi and NO<sub>3</sub> with yeast, and cultivated a UPN-patchouliol producing strain in  
424 these sub-optimal conditions (Figure 4A). We inoculated the 2X*PcPS*-SQS k.d. UPN  
425 strain into media containing  $6.0 \times 10^6$  cells mL<sup>-1</sup> yeast, the same cell density as  
426 reached in mid-log phase for the algal cells. We chose to provide CO<sub>2</sub> using  
427 potassium bicarbonate buffers(Dienst et al., 2020) rather than direct gas delivery to  
428 further challenge the phototrophic cultures. In all conditions, yeast cells did not  
429 proliferate, with either acetic acid as a carbon source, or in the photoautotrophic  
430 media (Figure 4A). Mixotrophic cultures exhibited lower algal cell densities in later  
431 stages of cultivation than in the absence of yeast, likely due to the yeast  
432 sequestering some of the acetic acid. However, in the establishment phase (days 0–  
433 3), growth with yeast was not markedly different than that of cultures without yeast.  
434 In photoautotrophic cultures, yeast was inoculated at higher starting cell densities  
435 ( $8 \times 10^6$  cells mL<sup>-1</sup>) as there is no organic carbon source. This density was chosen to  
436 determine if the yeast cells would competitively inhibit the inoculated algal cells.  
437 Here, the UPN strain was able to overtake the yeast cells, demonstrating linear  
438 growth in both conditions relative to carbon diffusion rates in the medium. Under all  
439 conditions, the presence of yeast contaminants did not hinder the accumulation of  
440 heterologous patchouliol in dodecane overlays which exhibited similar productivities  
441 per algal cell (Figure 4A). Our results indicate that both nitrate and phosphite are a  
442 powerful combination to limit contaminating microbial competitors in engineered algal  
443 cultivation concepts.

444 To determine if we could produce patchoulol in non-sterile conditions, we cultivated  
445 this strain in a CellDEG HD100 bioreactor with dodecane overlay using 6xPhi  
446 medium (Figure 4B). Dodecane impairs the hydrophobic gas delivery membrane of  
447 the reactors, so we used 200 mL culture volume to prevent the solvent interacting  
448 with the membrane. Previous photoautotrophic yields of this product were only  
449  $350 \mu\text{g L}^{-1}$  in 8 days (Lauersen et al., 2016). Here, without any process optimization,  
450  $\sim 6.2 \text{ mg patchoulol L}^{-1}$  was produced from  $\text{CO}_2$  in 7 days (Figure 4). A previous  
451 study with *Synechocystis* sp. PCC 6803 used a similar membrane gas delivery  
452 system for 10 mL cultures to generate up to  $17.3 \text{ mg patchoulol L}^{-1}$  in 8 days using a  
453 two-stage semi batch mode where half of the culture medium was replaced after 96  
454 hours. We did not further optimize our production experiments in the HD100, as the  
455 risk of dodecane-membrane wetting means cultivation must be performed with  
456 volumes not intended for the system. A further issue of the dodecane overlay in  
457 turbid algal cultures is the formation of emulsions with hydrophobic cellular  
458 components and the dodecane solvent (Lauersen, 2019). The surface interaction of  
459 culture and dodecane causes significant emulsion formation in this volume ratio  
460 (Figure 4B), which is less pronounced in smaller volume cultivation units.  
461 Nevertheless, our results indicated the combination of nitrate and phosphite  
462 metabolic capacities enable high-density cultivations of engineered strains to be  
463 performed with reduced risks of contamination without affecting process yields. To  
464 our knowledge, this is the first demonstration of combinatorial plastid and nuclear  
465 genome engineering in a green alga to generate a strain producing a heterologous  
466 product.

467

### 468 **4.3. Conclusions**

469 Here, we have demonstrated the complementation of the common UVM4 nuclear  
470 mutant with the genetic capacity for phosphite and nitrate metabolism. These  
471 modifications were possible without affecting the nuclear transgene expression  
472 abilities of UVM4 and enabled the engineering of heterologous isoprenoid production  
473 in strains capable of growth in contamination reducing media. We present a recipe  
474 for buffered phosphite solutions to replace those of phosphate in common *C.*  
475 *reinhardtii* media and show improved titers of patchoulol through combination of  
476 strategies known to improve flux to sesquiterpenoid products. Our work can be used  
477 as a guide for others to adapt phosphite-nitrate metabolism into their strains and may  
478 enhance the transition of lab-scale engineering to less-sterile production concepts.

479

480

481 **Acknowledgements**

482 Subcloning of *PcPS* plasmid 1X was performed in the lab of Prof. Dr. Olaf Kruse by  
483 Dr. Julian Wichmann and Dr. Thomas Baier as part of an Institute for Innovation  
484 Transfer (IIT), Universität Bielefeld, project funded by Lauersen (KAUST). The  
485 authors are grateful to Saul Purton for providing plasmid pPO3 and Prof. Dr. Ralph  
486 Bock for graciously providing strain UVM4 through MTA between the Max Planck  
487 Institute of Molecular Physiology and KAUST. We would like to express thanks to  
488 SSB group members for cooperation and collaboration during this project. The  
489 research reported in this publication was supported by baseline funding from KAUST  
490 to KL.  
491

## 492 **References**

- 493 Baier, T., Jacobebbinghaus, N., Einhaus, A., Lauersen, K. J., and Kruse, O. (2020).  
494 Introns mediate post-transcriptional enhancement of nuclear gene expression in  
495 the green microalga *Chlamydomonas reinhardtii*. *PLoS Genet.* 16, e1008944.  
496 doi:10.1371/journal.pgen.1008944.
- 497 Baier, T., Kros, D., Feiner, R. C., Lauersen, K. J., Müller, K. M., and Kruse, O.  
498 (2018a). Engineered Fusion Proteins for Efficient Protein Secretion and  
499 Purification of a Human Growth Factor from the Green Microalga  
500 *Chlamydomonas reinhardtii*. *ACS Synth. Biol.* 7, 2547–2557.  
501 doi:10.1021/acssynbio.8b00226.
- 502 Baier, T., Wichmann, J., Kruse, O., and Lauersen, K. J. (2018b). Intron-containing  
503 algal transgenes mediate efficient recombinant gene expression in the green  
504 microalga *Chlamydomonas reinhardtii*. *Nucleic Acids Res.* 46, 6909–6919.  
505 doi:10.1093/nar/gky532.
- 506 Barahimipour, R., Neupert, J., and Bock, R. (2016). Efficient expression of nuclear  
507 transgenes in the green alga *Chlamydomonas*: synthesis of an HIV antigen and  
508 development of a new selectable marker. *Plant Mol. Biol.*, 1–16.  
509 doi:10.1007/s11103-015-0425-8.
- 510 Changko, S., Rajakumar, P. D., Young, R. E. B., and Purton, S. (2020). The  
511 phosphite oxidoreductase gene, *ptxD* as a bio-contained chloroplast marker and  
512 crop-protection tool for algal biotechnology using *Chlamydomonas*. *Appl.*  
513 *Microbiol. Biotechnol.* 104, 675–686. doi:10.1007/s00253-019-10258-7.
- 514 Crozet, P., Navarro, F. J., Willmund, F., Mehrshahi, P., Bakowski, K., Lauersen, K.  
515 J., et al. (2018). Birth of a Photosynthetic Chassis: A MoClo Toolkit Enabling  
516 Synthetic Biology in the Microalga *Chlamydomonas reinhardtii*. *ACS Synth. Biol.*  
517 7, 2074–2086. doi:10.1021/acssynbio.8b00251.
- 518 Cutolo, E., Tosoni, M., Barera, S., Herrera-Estrella, L., Dall’Osto, L., and Bassi, R.  
519 (2020). A Phosphite Dehydrogenase Variant with Promiscuous Access to  
520 Nicotinamide Cofactor Pools Sustains Fast Phosphite-Dependent Growth of  
521 Transplastomic *Chlamydomonas reinhardtii*. *Plants* 9, 473.  
522 doi:10.3390/plants9040473.
- 523 Dahlin, L. R., and Guarnieri, M. T. (2022). Heterologous expression of phosphite  
524 dehydrogenase in the chloroplast or nucleus enables phosphite utilization and  
525 genetic selection in *Picochlorum* spp. *Algal Res.* 62, 102604.  
526 doi:10.1016/j.algal.2021.102604.
- 527 Dienst, D., Wichmann, J., Mantovani, O., Rodrigues, J. S., and Lindberg, P. (2020).  
528 High density cultivation for efficient sesquiterpenoid biosynthesis in  
529 *Synechocystis* sp. PCC 6803. *Sci. Rep.* 10, 5932. doi:10.1038/s41598-020-  
530 62681-w.
- 531 Dyo, Y. M., and Purton, S. (2018). The algal chloroplast as a synthetic biology  
532 platform for production of therapeutic proteins. *Microbiology*, 1–9.  
533 doi:10.1099/mic.0.000599.
- 534 Einhaus, A., Baier, T., Rosenstengel, M., Freudenberg, R. A., and Kruse, O. (2021).  
535 Rational Promoter Engineering Enables Robust Terpene Production in  
536 Microalgae. *ACS Synth. Biol.* doi:10.1021/acssynbio.0c00632.
- 537 Fernández, E., Schnell, R., Ranum, L. P., Hussey, S. C., Silflow, C. D., and  
538 Lefebvre, P. A. (1989a). Isolation and characterization of the nitrate reductase  
539 structural gene of *Chlamydomonas reinhardtii*. *Proc. Natl. Acad. Sci. U. S. A.* 86,  
540 6449–6453. doi:10.1073/pnas.86.17.6449.
- 541 Fernández, E., Schnell, R., Ranum, L. P., Hussey, S. C., Silflow, C. D., and

- 542 Lefebvre, P. A. (1989b). Isolation and characterization of the nitrate reductase  
543 structural gene of *Chlamydomonas reinhardtii*. *Proc. Natl. Acad. Sci.* 86, 6449–  
544 6453. Available at: <http://www.pnas.org/content/86/17/6449.abstract>.
- 545 Freudenberg, R. A., Baier, T., Einhaus, A., Wobbe, L., and Kruse, O. (2021). High  
546 cell density cultivation enables efficient and sustainable recombinant polyamine  
547 production in the microalga *Chlamydomonas reinhardtii*. *Bioresour. Technol.*  
548 323, 124542. doi:10.1016/j.biortech.2020.124542.
- 549 Gorman, D. S., and Levine, R. P. (1965). Cytochrome f and plastocyanin: their  
550 sequence in the photosynthetic electron transport chain of *Chlamydomonas*  
551 *reinhardtii*. *Proc. Natl. Acad. Sci.* 54, 1665–1669. doi:10.1073/pnas.54.6.1665.
- 552 Kindle, K. L. (1990). High-frequency nuclear transformation of *Chlamydomonas*  
553 *reinhardtii*. *Proc. Natl. Acad. Sci. USA* 87, 1228–1232. Available at:  
554 <http://www.pnas.org/content/87/3/1228.abstract>.
- 555 Kindle, K. L., Richards, K. L., and Stern, D. B. (1991). Engineering the chloroplast  
556 genome: Techniques and capabilities for chloroplast transformation in  
557 *Chlamydomonas reinhardtii*. *Proc. Natl. Acad. Sci. U. S. A.* 88, 1721–1725.  
558 doi:10.1073/pnas.88.5.1721.
- 559 Kropat, J., Hong-Hermesdorf, A., Casero, D., Ent, P., Castruita, M., Pellegrini, M., et  
560 al. (2011). A revised mineral nutrient supplement increases biomass and growth  
561 rate in *Chlamydomonas reinhardtii*. *Plant J.* 66, 770–780. doi:10.1111/j.1365-  
562 313X.2011.04537.x.
- 563 Lauersen, K. J. (2019). Eukaryotic microalgae as hosts for light-driven heterologous  
564 isoprenoid production. *Planta* 249, 155–180. doi:10.1007/s00425-018-3048-x.
- 565 Lauersen, K. J., Baier, T., Wichmann, J., Wördenweber, R., Mussgnug, J. H.,  
566 Hübner, W., et al. (2016). Efficient phototrophic production of a high-value  
567 sesquiterpenoid from the eukaryotic microalga *Chlamydomonas reinhardtii*.  
568 *Metab. Eng.* 38, 331–343. doi:10.1016/j.ymben.2016.07.013.
- 569 Lauersen, K. J., Berger, H., Mussgnug, J. H., and Kruse, O. (2013a). Efficient  
570 recombinant protein production and secretion from nuclear transgenes in  
571 *Chlamydomonas reinhardtii*. *J. Biotechnol.* 167, 101–110.  
572 doi:<http://dx.doi.org/10.1016/j.jbiotec.2012.10.010>.
- 573 Lauersen, K. J., Huber, I., Wichmann, J., Baier, T., Leiter, A., Gaukel, V., et al.  
574 (2015a). Investigating the dynamics of recombinant protein secretion from a  
575 microalgal host. *J. Biotechnol.* 215, 62–71. doi:10.1016/j.jbiotec.2015.05.001.
- 576 Lauersen, K. J., Kruse, O., and Mussgnug, J. H. (2015b). Targeted expression of  
577 nuclear transgenes in *Chlamydomonas reinhardtii* with a versatile, modular  
578 vector toolkit. *Appl. Microbiol. Biotechnol.* 99, 3491–3503. doi:10.1007/s00253-  
579 014-6354-7.
- 580 Lauersen, K. J., Vanderveer, T. L., Berger, H., Kaluza, I., Mussgnug, J. H., Walker,  
581 V. K., et al. (2013b). Ice recrystallization inhibition mediated by a nuclear-  
582 expressed and -secreted recombinant ice-binding protein in the microalga  
583 *Chlamydomonas reinhardtii*. *Appl. Microbiol. Biotechnol.* 97, 9763–9772.  
584 doi:10.1007/s00253-013-5226-x.
- 585 Lauersen, K. J., Wichmann, J., Baier, T., Kampranis, S. C., Pateraki, I., Møller, B. L.,  
586 et al. (2018). Phototrophic production of heterologous diterpenoids and a  
587 hydroxy-functionalized derivative from *Chlamydomonas reinhardtii*. *Metab. Eng.*  
588 49, 116–127. doi:10.1016/j.ymben.2018.07.005.
- 589 Loera-Quezada, M. M., Leyva-González, M. A., Velázquez-Juárez, G., Sanchez-  
590 Calderón, L., Do Nascimento, M., López-Arredondo, D., et al. (2016). A novel  
591 genetic engineering platform for the effective management of biological

- 592 contaminants for the production of microalgae. *Plant Biotechnol. J.* 14, 2066–  
593 2076. doi:10.1111/pbi.12564.
- 594 López-Arredondo, D. L., and Herrera-Estrella, L. (2012). Engineering phosphorus  
595 metabolism in plants to produce a dual fertilization and weed control system.  
596 *Nat. Biotechnol.* 30, 889–893. doi:10.1038/nbt.2346.
- 597 Neupert, J., Gallaher, S. D., Lu, Y., Strenkert, D., Barahimipour, R., Fitz-gibbon, S.  
598 T., et al. (2020). An epigenetic gene silencing pathway selectively acting on  
599 transgenic DNA in the green alga *Chlamydomonas*. *Nat. Commun.*, 1–92.  
600 doi:10.1038/s41467-020-19983-4.
- 601 Neupert, J., Karcher, D., and Bock, R. (2009). Generation of *Chlamydomonas* strains  
602 that efficiently express nuclear transgenes. *Plant J.* 57, 1140–1150.  
603 doi:10.1111/j.1365-313X.2008.03746.x.
- 604 Overmans, S., and Lauersen, K. J. (2022). Biocompatible fluorocarbon liquid  
605 underlays for in situ extraction of isoprenoids from microbial cultures. *bioRxiv*.  
606 doi:10.1101/2022.01.27.477974.
- 607 Perozeni, F., Cazzaniga, S., Baier, T., Zanoni, F., Zoccatelli, G., Lauersen, K. J., et  
608 al. (2020). Turning a green alga red: engineering astaxanthin biosynthesis by  
609 intragenic pseudogene revival in *Chlamydomonas reinhardtii*. *Plant Biotechnol.*  
610 *J.* 18, 2053–2067. doi:10.1111/pbi.13364.
- 611 Schnell, R. A., and Lefebvre, P. A. (1993). Isolation of the *chlamydomonas*  
612 regulatory gene NIT2 by transposon tagging. *Genetics* 134, 737–747. doi:NIT21.
- 613 Scranton, M. A., Ostrand, J. T., Georgianna, D. R., Lofgren, S. M., Li, D., Ellis, R. C.,  
614 et al. (2016). Synthetic promoters capable of driving robust nuclear gene  
615 expression in the green alga *Chlamydomonas reinhardtii*. *Algal Res.* 15, 135–  
616 142. doi:10.1016/j.algal.2016.02.011.
- 617 Wannathong, T., Waterhouse, J. C., Young, R. E. B., Economou, C. K., and Purton,  
618 S. (2016). New tools for chloroplast genetic engineering allow the synthesis of  
619 human growth hormone in the green alga *Chlamydomonas reinhardtii*. *Appl.*  
620 *Microbiol. Biotechnol.* doi:10.1007/s00253-016-7354-6.
- 621 Wichmann, J., Baier, T., Wentnagel, E., Lauersen, K. J., and Kruse, O. (2018).  
622 Tailored carbon partitioning for phototrophic production of (E)- $\alpha$ -bisabolene from  
623 the green microalga *Chlamydomonas reinhardtii*. *Metab. Eng.* 45, 211–222.  
624 doi:10.1016/j.ymben.2017.12.010.
- 625 Yunus, I. S., Wichmann, J., Wördenweber, R., Lauersen, K. J., Kruse, O., and  
626 Jones, P. R. (2018). Synthetic metabolic pathways for photobiological  
627 conversion of CO<sub>2</sub> into hydrocarbon fuel. *Metab. Eng.* 49, 201–211.  
628 doi:10.1016/j.ymben.2018.08.008.
- 629 Zabawinski, C., Koornhuyse, N. V. a N. D. E. N., Hulst, C. D., Schlichting, R.,  
630 Giersch, C., Delrue, B., et al. (2001). Starchless Mutants of *Chlamydomonas*  
631 *reinhardtii* Lack the Small Subunit of a Heterotetrameric ADP-Glucose  
632 Pyrophosphorylase. 183, 1069–1077. doi:10.1128/JB.183.3.1069.
- 633



## 634 **Figure legends**

635 **Figure 1.** Complementation of *C. reinhardtii* strain UVM4 for growth on phosphite  
636 and nitrate. **A** Plasmid pPO3 (Changko et al., 2020) was transformed into UVM4 and  
637 colonies were recovered on TAPhi agar medium. Colonies were then cultivated in  
638 TAPhi liquid medium and one strain (UVM4-Phi) was selected for further  
639 complementation with pMN24(Fernández et al., 1989b) and pMN68 (Schnell and  
640 Lefebvre, 1993) (*nit1/nit2*) plasmids. Selection was performed on TAPhi-NO<sub>3</sub> plates  
641 and resultant colonies capable of growth on phosphite and nitrate (UPN) were  
642 cultivated in liquid mixotrophic (TAPhi-NO<sub>3</sub>) and autotrophic (6xPhi) media. Parental  
643 strains were grown as reference in each previous stage media as shown. **B** Growth  
644 curves of liquid cultures of selected colonies which performed well in TAPhi-NO<sub>3</sub>  
645 media in TAPhi-NO<sub>3</sub> or 6xPhi media. Parental strains UVM4 and UVM4-phi, were not  
646 able to proliferate in the nitrate phosphite containing media. **C** UPN strains were  
647 investigated by iodine vapour staining at the agar plate level to determine if the  
648 transformation of three plasmids above had caused background mutations in starch  
649 synthesis. Dark colour of colonies indicates presence of starch, yellow or light colour  
650 indicates perturbed starch metabolism as shown for the starchless *sta6* (Zabawinski  
651 et al., 2001) mutant. Lighter starch staining is observed in UPN strains 19 and 23. **D**  
652 Strains UVM4, UVM4-Phi, UPN1 and UPN22 were transformed with the  
653 pOpt2\_mVenus\_Paro plasmid (cartoon) conferring paromomycin resistance and  
654 expressing the mVenus (YFP reporter). High-throughput robotic colony picking and  
655 fluorescence imaging was used to benchmark YFP expression across the  
656 transformant population. Chlorophyll fluorescence (red) was used to identify true  
657 colonies, and YFP fluorescence (yellow) was graded for intensity of signal and  
658 plotted comparing numbers of high, medium, and low or no expression (right).  
659 Individual colonies analyzed for each transformation event summed from several  
660 plates are indicated for each strain. *C. reinhardtii* genetic elements: A – HSP70A  
661 promoter, R – RBCS2 promoter, i1 – RBCS2 intron 1, i2, RBCS2 intron 2, β – beta  
662 tubulin promoter and its 5' untranslated region (UTR), 3'UTR – RBCS2 3' UTR  
663

664 **Figure 2.** Buffered phosphite solutions can be used in algal high cell density medium  
665 concepts to replace phosphate. **A** Growth of strain UPN22 was tracked in  
666 cultivations in 100 mL of 6XP (solid line) or 6XPhi (dashed line) media in CellDeg  
667 HD100 cultivators following the CO<sub>2</sub> and light regime indicated. Spectrum of the  
668 Valoya daylight lamp is shown. Cell densities were recorded daily. **B** Forward and  
669 backscatter plots from flow cytometry of samples from day 6 of each culture with  
670 photographs of the dense green culture in either medium.  
671

672 **Figure 3:** Genetic constructs used to generate heterologous patchoulol production  
673 from a UPN strain. Single, double, triple, and quadruple copies of the *C. reinhardtii*  
674 codon optimized, intron containing *P. cabilin* patchoulol synthase were fused to  
675 generate different expression plasmids with C-terminal mVenus (YFP) reporter  
676 fusions as previously described(Lauersen et al., 2016). Each plasmid was  
677 transformed into UPN and mVenus (YFP) expressing colonies were isolated for each  
678 construct and benchmarked for patchoulol production (n=6). The chemical structure  
679 of patchoulol is shown. The best performing individual from each plasmid was then  
680 subsequently transformed with a plasmid expressing a luciferase-amiRNA construct  
681 which downregulates the *C. reinhardtii* squalene synthase. Combined high-  
682 throughput fluorescence and luciferase screening of colonies led to isolation of  
683 strains with both constructs expressed (n=6) which were then subsequently  
684 benchmarked for patchoulol productivity.  
685

686 **Figure 4.** Production of heterologous sesquiterpenoid in the presence of  
687 contamination. **A** *C. reinhardtii* UPN 22 expressing 2XPcPS-YFP + SQS-amiRNA  
688 was cultivated in different trophic modes with and without phosphite and intentionally  
689 contaminated with *S. cerevisiae* cells. TAP-NO<sub>3</sub> and TAPhi-NO<sub>3</sub> were used to  
690 compare mixotrophic conditions where acetic acid was a sole carbon source, while  
691 6xP and 6xPhi were used to test photoautotrophic conditions. All growth curves with  
692 Phi are represented with dashed lines and hashed bars. Dodecane overlay was used  
693 to capture heterologous patchoulol produced. Yeast cells were intentionally  
694 inoculated at high densities to challenge the algal cells to outcompete them in these  
695 conditions. CO<sub>2</sub> was delivered to autotrophic cultures by placing high-concentration  
696 bicarbonate buffer between microtiter plate wells as an inefficient delivery  
697 mechanism to further challenge the algal cells. **B** cultivation of this strain in 6xPhi  
698 medium in HD100 cultivator (pictured) with dodecane overlay resulted in efficient  
699 patchoulol production from CO<sub>2</sub>. Two GC-MS chromatograms are shown, one of  
700 dodecane blank with alpha-humulene internal standard and one from algal culture  
701 indicating the peak of produced patchoulol.  
702

## 703 Supplemental figure legends

704

705 **Supplemental Figure 1:** Modifications to the pOpt2 plasmids used in this work.  
706 **Above:** Overview of plasmid architecture of the pOpt 2.0 vectors from Wichmann et  
707 al. (2018) 10.1016/j.ymben.2017.12.010. The gene of interest (GOI) reporter  
708 cassette is highlighted. **Middle:** in this work, we modified the GOI cassette to contain  
709 the optimized HSP70A, beta-tubulin (and 5'UTR) from Einhaus et al. (2021)  
710 10.1021/acssynbio.0c00632. The mVenus reporter (NCBI: AAZ65844) was also  
711 modified to contain two copies of the RBCS2 intron 1, and the RBCS2 intron 2 was  
712 moved into the C-terminal StrepII tag, so that future C-terminal fusions could benefit  
713 from this orientation in a similar fashion to that presented in Freudenberg et al.  
714 (2021) 10.1016/j.bior tech.2020.124542. All elements are from *C. reinhardtii*: A –  
715 HSP70A promoter, R – RBCS2 promoter, i1 – RBCS2 intron 1, i2, RBCS2 intron 2,  $\beta$   
716 – beta tubulin promoter and its 5' untranslated region (UTR), 3'UTR – RBCS2 3'  
717 UTR. AmpR – ampicillin resistance cassette of the pBluescript SK(+) backbone.  
718 **Below:** Plasmids for the expression of the *C. reinhardtii* codon optimized and  
719 synthetic intron-containing *Pogostemon cablin* patchoulol synthase (UniProt:  
720 Q49SP3, PcPS). Modified pOpt2.0 expression cassettes were used to subclone the  
721 PcPS which had been previously codon optimized (including intron spreading) for  
722 expression from the nuclear genome of *C. reinhardtii* (NCBI: KX097887, Lauersen et  
723 al. (2016) 10.1016/j.ymben.2016.07.013). All plasmids have the pOpt2.0 –  
724 paromomycin resistance cassette (P) 3' of the GOI expression cassette pictured (as  
725 in Wichmann et al. (2018)). Subcloning of PcPS plasmid 1X was performed in the lab  
726 of Prof. Dr. Olaf Kruse by Dr. Julian Wichmann and Dr. Thomas Baier as part of an  
727 Institute for Innovation Transfer (IIT) project funded by Lauersen (KAUST). Further  
728 subcloning of 2X, 3X, 4X were performed by Dr. Gordon Wellman in Lauersen's lab  
729 at KAUST. Abbreviations: Y – mVenus expression cassette, 1X, 2X, 3X, 4X plasmids  
730 contain the respective numbers of PcPs copies. Cloning was achieved by using the  
731 previous plasmid, with *Scal*-*Bam*HI as the receiving vector and *Scal*-*Bgl*II as an  
732 insert to amplify the PcPS coding sequence.

733

734 **Supplemental Figure 2:** Confirmation of pPO3 integration into the chloroplast  
735 genome of UVM4 in derivative strains UVM4-phi and UPN22. Primers Fw:  
736 AATTGTATGGGCTCACAACAACTTAAAGT and Rv:  
737 TAAAATTGTGAGACCATGAGTAATGTTCTCTCC were used to perform PCR on  
738 DNA extracts from each strain. The target region without amplification should yield  
739 1050 bp band, while integration should yield 3075 bp products.

740

741 **Supplemental Figure 3:** In gel fluorescence of SDS PAGE samples from one  
742 representative mutant of each of the genetic constructs indicated. Fluorescence  
743 image was captured with 510/10 nm excitation and 530/10 nm emission filter in the  
744 Analytik Jena Chemstudio Plus with eLite. White contrast black and white image was  
745 taken without emission filter using 510/10 nm excitation to visualize the marker.

746

747 **Supplemental Figure 4:** Patchoulol productivities observed in dodecane overlays  
748 for 6 transformants selected for bright YFP fluorescence from each of the above  
749 plasmids and compared to parental UPN strain and empty vector (Y) generated  
750 control strains. Numbers at the bottom of the graph correspond to plasmid name and  
751 mutant number (1.1 = 1X PcPS, transformant #1). Productivity-grouped averages  
752 are shown on the left and labelled with each plasmid name.

753

754 **Supplemental Figure 5:** Patchoulol productivities observed in dodecane overlays  
755 for six transformants isolated from secondary transformation of the best 1-4X PcPS

756 strains with cCA\_gLuc\_i3\_SQSk.d. plasmid (Wichmann et al. 2018). **Upper right:**  
757 representative GC-MS chromatograms showing the drastic increase of patchoulol  
758 production in SQS k.d. secondary transformants relative to alpha-humulene internal  
759 standard. **Lower graphs:** Numbers at the bottom of the graph correspond to plasmid  
760 name and mutant number (1x1 = 1X PcPS SQS k.d. mutant 1). The averages of all  
761 transformants per group are shown on the left and labelled with each plasmid name.  
762 Corresponding parent performances are also shown from the data in previous figure.  
763  
764

765

766 **Tables**

767 **Supplemental Table 1.** Genetic constructs used in this study. Plasmids for  
768 transformation of *C. reinhardtii* are shown as well as some of their respective  
769 properties. References to plasmid sequences are given and those generated in this  
770 work are provided in the supplement.

771

772

## 773 **5. Contribution to the field statement**

774 In this work, we combine previously published optimizations in algal metabolism in a  
775 mutant workhorse for nuclear transgene expression. We expand this strain with the  
776 metabolic capacity for use of inorganic phosphite as a sole phosphorous source, and  
777 nitrate as a nitrogen source. These combined engineering steps enable the  
778 cultivation of this strain in both high-density culture media, with loading of nitrates to  
779 increase cell densities, and the use of phosphite to mitigate contamination. We  
780 present recipes for replacing phosphate buffers with phosphite buffers and  
781 demonstrate heterologous production of the sesquiterpenoid patchoulol by  
782 combining synthase overexpression with competitive pathway knockdown. Our work  
783 is the first example of combinatorial chloroplast and nuclear genome engineering for  
784 heterologous metabolite engineering in a green algal host and sets an example for  
785 future engineering in these hosts to enable scalable cultivation concepts.

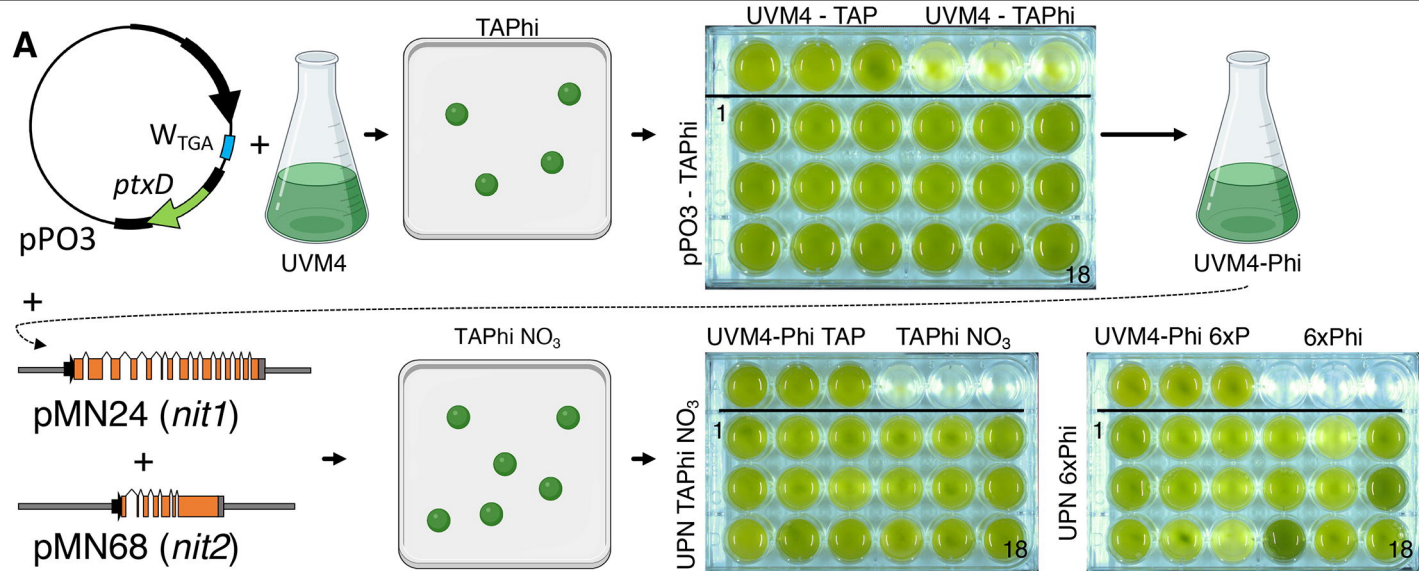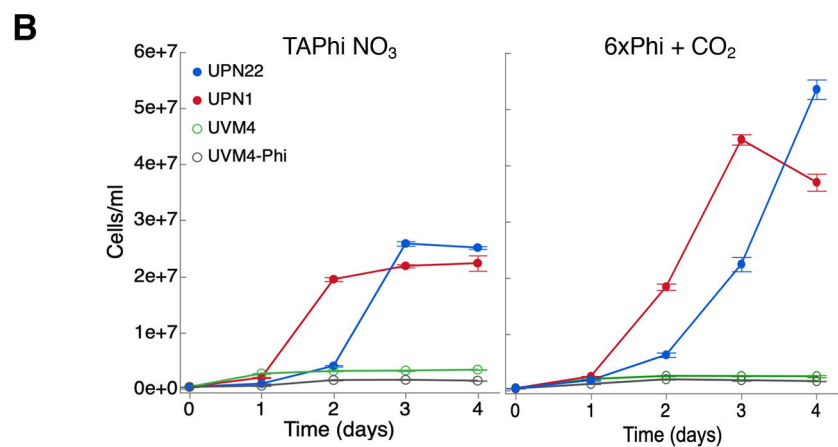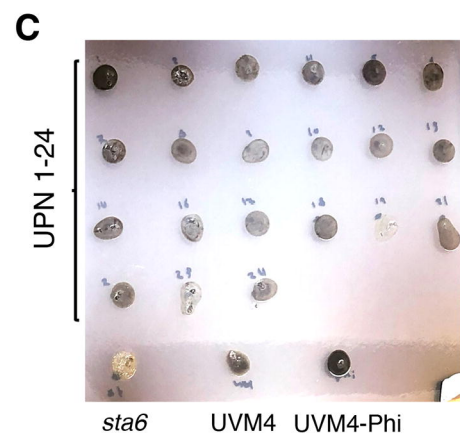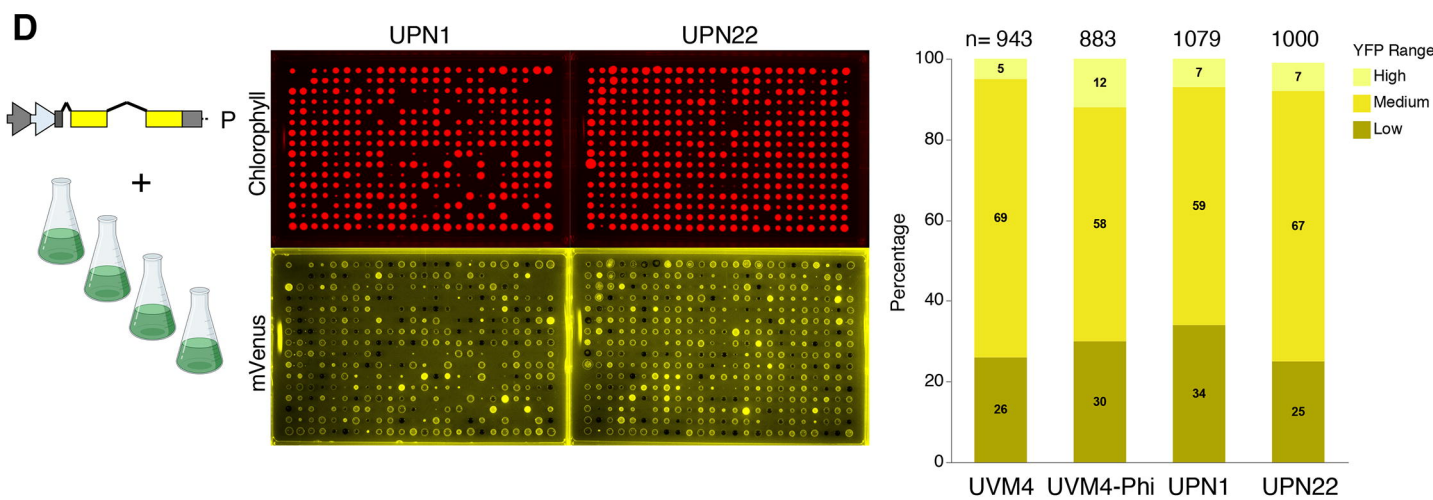

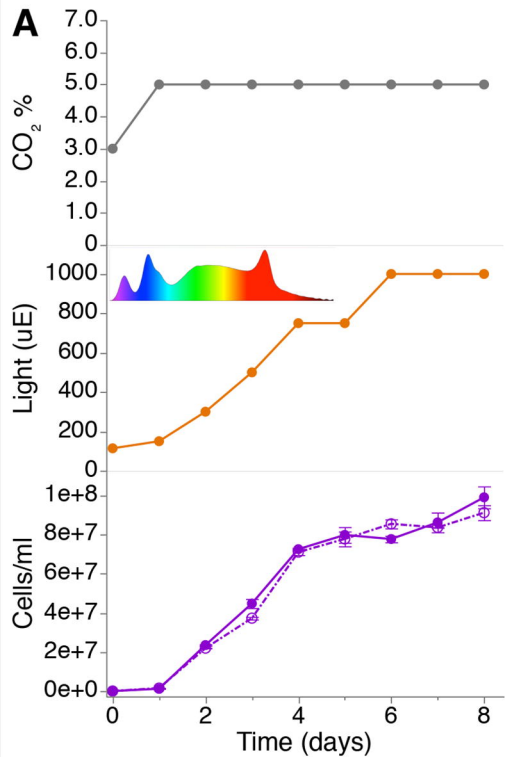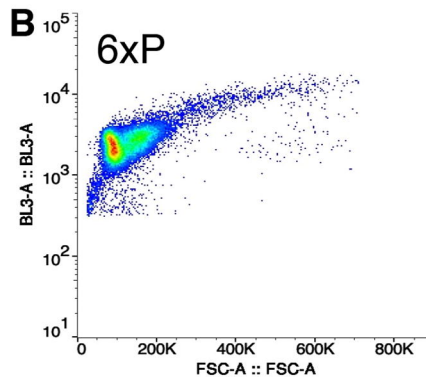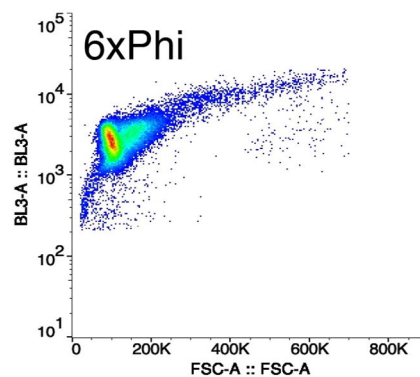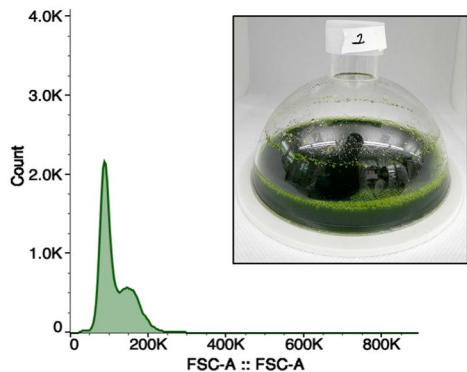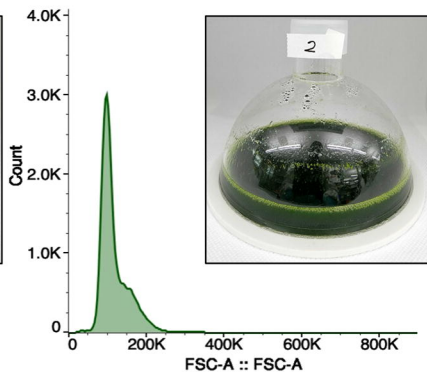



▶ pHSP70A    **P** ParomomycinR  
 ◀ pRBCS2  
 ▶ pβtubulin    **S** SpectinomycinR    ^ ^ RBCS2 introns

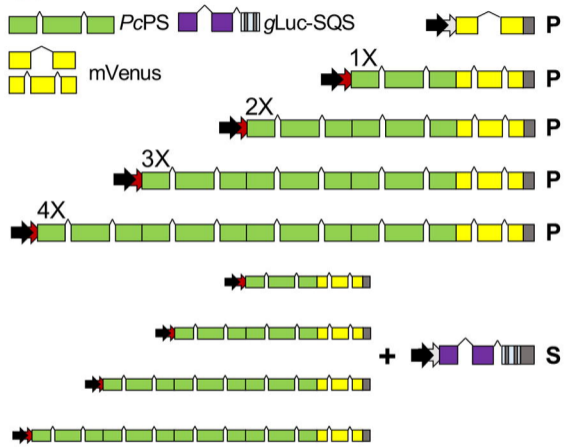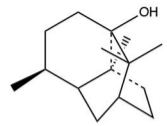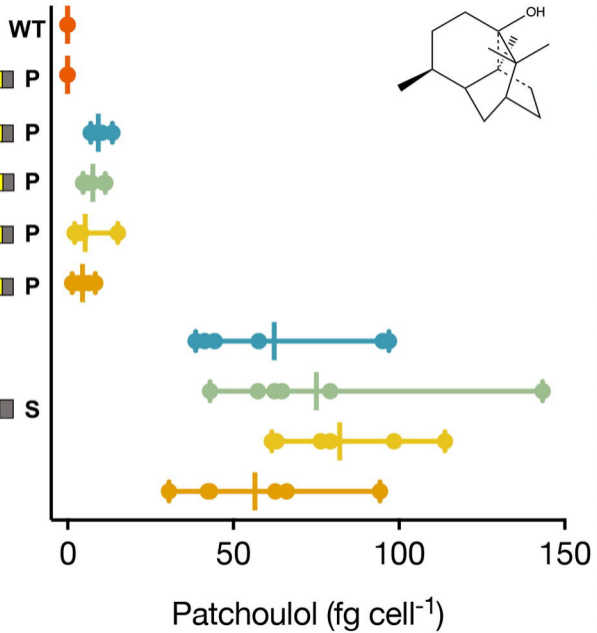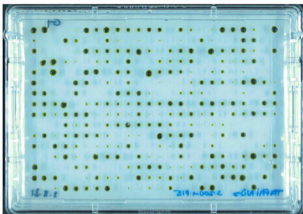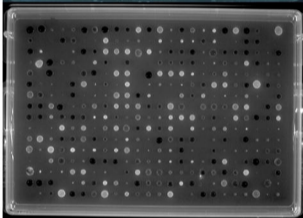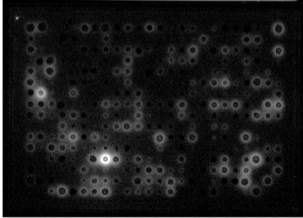

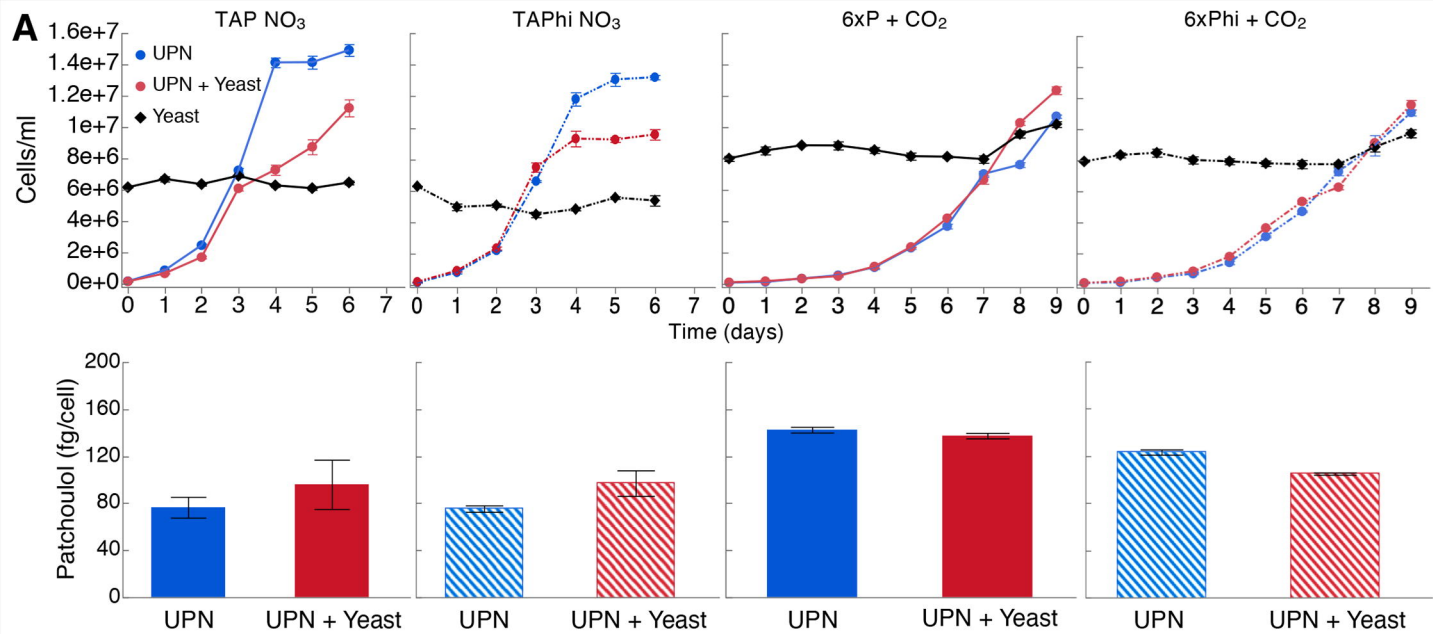

**B**

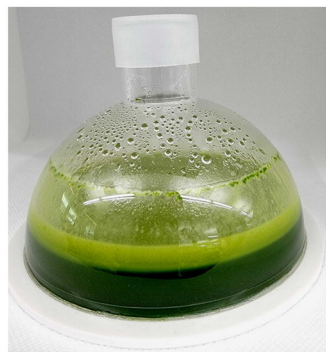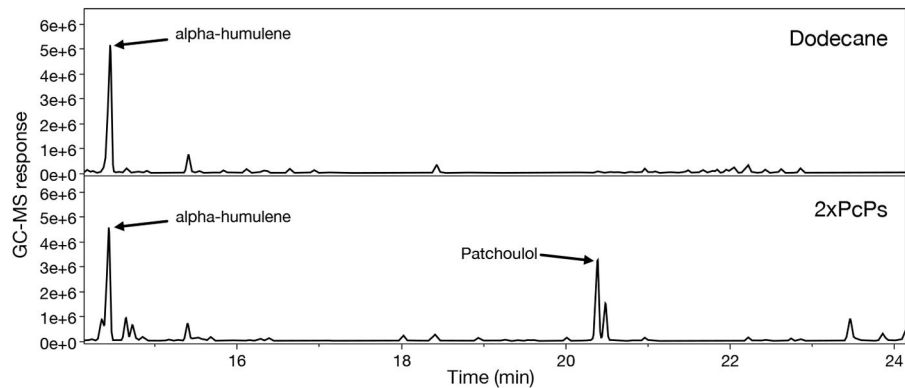

Source: http://biorxiv.org/content/10.1101/2022.02.28.482248v1.full.pdf
